# Supplementary material for: Context-dependent interactions and the regulation of species richness in freshwater fish
Source: PubMed Central journal article supplement (PMC5840330; doi:10.1038/s41467-018-03419-1), 2018-03-06
Supplement: 41467_2018_3419_MOESM1_ESM.pdf [file 41467_2018_3419_MOESM1_ESM.pdf]

# Context-dependent interactions and the regulation of species richness in freshwater fish

MacDougall, A.S. et al.

Supplementary Table 1. Species list of (A) Ontario fish species included in this study, based on species captured by BSM surveys in at least 40 of the 721 lakes, and (B) species grouped into the category of ‘small prey’: these species are assumed to be prey for most other fish species, and mostly inhabit the littoral zone of lakes. Further, their small size means they tend to be under-sampled by the BSM net-based fish sampling. The remaining species (C) occurred in fewer than 40 lakes, and were excluded from the analysis due to their infrequency. The 721 lakes occur over an 11-degree latitudinal gradient (43.06 – 54.52 degrees), range in area from 21-90,484 ha, have maximum depths of 1-214 m, range in phosphorus levels from 1.7-52.5 units, and have a range of total degree days from 1059-2246. Average length for each species are from Ontario lakes, and taken from Holm et al (2010)<sup>1</sup>. Thermal guilds (water temperature preferences) are taken from Hasnain et al. 2013<sup>2</sup>.

| Common Name | Species name | Family | Number of lakes<br>(n = 721) | Average length<br>(cm) | Thermal guild | Functional Group |
|-------------|--------------|--------|------------------------------|------------------------|---------------|------------------|
|-------------|--------------|--------|------------------------------|------------------------|---------------|------------------|

(A) *Large fishes species*

|               |                    |          |     |      |      |          |
|---------------|--------------------|----------|-----|------|------|----------|
| Northern Pike | <i>Esox lucius</i> | Esocidae | 528 | 61.0 | Cool | Predator |
| Muskellunge   | <i>Esox</i>        | Esocidae | 43  | 96.5 | Warm | Predator |

|              |                         |               |     |      |           |          |
|--------------|-------------------------|---------------|-----|------|-----------|----------|
|              | <i>masquinongy</i>      |               |     |      |           |          |
| Walleye      | <i>Sander vitreus</i>   | Percidae      | 499 | 42.0 | Cool      | Predator |
| Lake Trout   | <i>Salvelinus</i>       | Salmonidae    | 298 | 44.5 | Cold      | Predator |
|              | <i>namaycush</i>        |               |     |      |           |          |
| Burbot       | <i>Lota lota</i>        | Gadidae       | 250 | 38.0 | Cold/Cool | Predator |
| Cisco        | <i>Coregonus artedi</i> | Salmonidae    | 385 | 25.0 | Cold      | Pelagic  |
| Lake         | <i>Coregonus</i>        | Salmonidae    | 374 | 38.0 | Cold      | Pelagic  |
| Whitefish    | <i>clupeaformis</i>     |               |     |      |           |          |
| Brook Trout  | <i>Salvelinus</i>       | Salmonidae    | 77  | 28.0 | Cold      | Pelagic  |
|              | <i>fontinalis</i>       |               |     |      |           |          |
| Longnose     | <i>Catostomus</i>       | Catostomidae  | 82  | 33.5 | Cold      | Littoral |
| Sucker       | <i>catostomus</i>       |               |     |      |           |          |
| White Sucker | <i>Catostomus</i>       | Catostomidae  | 678 | 41   | Cool      | Littoral |
|              | <i>commersonii</i>      |               |     |      |           |          |
| Shorthead    | <i>Moxostoma</i>        | Catostomidae  | 90  | 41.0 | Warm      | Littoral |
| Redhorse     | <i>macrolepidotum</i>   |               |     |      |           |          |
| Rock Bass    | <i>Ambloplites</i>      | Centrarchidae | 295 | 20.0 | Cool      | Littoral |
|              | <i>rupestris</i>        |               |     |      |           |          |
| Pumpkinseed  | <i>Lepomis gibbosus</i> | Centrarchidae | 154 | 18.0 | Warm      | Littoral |
| Sunfish      |                         |               |     |      |           |          |
| Bluegill     | <i>Lepomis</i>          | Centrarchidae | 48  | 19.0 | Warm      | Littoral |
|              | <i>macrochirus</i>      |               |     |      |           |          |
| Smallmouth   | <i>Micropterus</i>      | Centrarchidae | 333 | 30.0 | Warm      | Predator |
| Bass         | <i>dolomieu</i>         |               |     |      |           |          |
| Largemouth   | <i>Micropterus</i>      | Centrarchidae | 85  | 30.0 | Warm      | Predator |

|                              |                                 |               |     |      |           |            |
|------------------------------|---------------------------------|---------------|-----|------|-----------|------------|
| Bass                         | <i>salmoides</i>                |               |     |      |           |            |
| Black Crappie                | <i>Pomoxis nigromaculatus</i>   | Centrarchidae | 55  | 21.5 | Cool      | Littoral   |
| Brown                        | <i>Ameiurus</i>                 | Ictaluridae   | 133 | 28.0 | Warm      | Littoral   |
| Bullhead                     | <i>nebulosus</i>                |               |     |      |           |            |
| Yellow Perch                 | <i>Perca flavescens</i>         | Percidae      | 526 | 18.0 | Cool      | Littoral   |
| Sauger                       | <i>Sander canadensis</i>        | Percidae      | 45  | 33.0 | Cool      | Predator   |
| (B) <i>Small prey fishes</i> |                                 |               |     |      |           |            |
| Mottled                      | <i>Cottus bairdii</i>           | Cottidae      | 51  | 7.5  | Cold      | Small prey |
| Sculpin                      |                                 |               |     |      |           |            |
| Slimy Sculpin                | <i>Cottus cognatus</i>          | Cottidae      | 51  | 7.5  | Cold      | Small prey |
| Spoonhead                    | <i>Cottus ricei</i>             | Cottidae      | 22  | 5.5  | Cold      | Small prey |
| Sculpin                      |                                 |               |     |      |           |            |
| Deepwater sculpin            | <i>Myoxocephalus thompsonii</i> | Cottidae      | 11  | 8.0  | Cold      | Small prey |
| Lake Chub                    | <i>Couesius plumbeus</i>        | Cyprinidae    | 104 | 10.0 | Cold      | Small prey |
| Common Shiner                | <i>Luxilus cornutus</i>         | Cyprinidae    | 155 | 9.0  | Cool      | Small prey |
| Northern Pearl Dace          | <i>Margariscus margarita</i>    | Cyprinidae    | 50  | 9.0  | Cold/cool | Small prey |
| Golden Shiner                | <i>Notemigonus crysoleucas</i>  | Cyprinidae    | 8   | 10.0 | Cool      | Small prey |

|                           |                                    |                |     |      |           |            |
|---------------------------|------------------------------------|----------------|-----|------|-----------|------------|
| Emerald<br>Shiner         | <i>Notropis<br/>atherinoides</i>   | Cyprinidae     | 159 | 7.5  | Cool      | Small prey |
| Blackchin<br>Shiner       | <i>Notropis<br/>heterodon</i>      | Cyprinidae     | 49  | 6.0  | Cool/warm | Small prey |
| Blacknose<br>Shiner       | <i>Notropis<br/>heterolepis</i>    | Cyprinidae     | 127 | 6.5  | Cool/warm | Small prey |
| Spottail<br>Shiner        | <i>Notropis<br/>hudsonius</i>      | Cyprinidae     | 344 | 7.0  | Cold/cool | Small prey |
| Mimic Shiner              | <i>Notropis<br/>volucellus</i>     | Cyprinidae     | 46  | 6.0  | Warm      | Small prey |
| Northern<br>Redbelly Dace | <i>Phoxinus eos*</i>               | Cyprinidae     | 42  | 5.5  | Cool/warm | Small prey |
| Bluntnose<br>Minnow       | <i>Pimephales<br/>notatus</i>      | Cyprinidae     | 113 | 6.5  | Warm      | Small prey |
| Fathead<br>Minnow         | <i>Pimephales<br/>promelas</i>     | Cyprinidae     | 42  | 5.0  | Warm      | Small prey |
| Blacknose<br>Dace         | <i>Rhinichthys<br/>atratulus</i>   | Cyprinidae     | 13  | 8.0  | Cool      | Small prey |
| Longnose<br>Dace          | <i>Rhinichthys<br/>cataractae</i>  | Cyprinidae     | 12  | 7.5  | Cool      | Small prey |
| Creek Chub                | <i>Semotilus<br/>atromaculatus</i> | Cyprinidae     | 39  | 10.0 | Cool      | Small prey |
| Banded<br>Killifish       | <i>Fundulus<br/>diaphanus</i>      | Fundulidae     | 9   | 7.0  | Cool      | Small prey |
| Brook                     | <i>Culaea</i>                      | Gasterosteidae | 40  | 5.0  | Cool      | Small prey |

|                 |                         |                |     |      |            |            |
|-----------------|-------------------------|----------------|-----|------|------------|------------|
| Stickleback     | <i>inconstans</i>       |                |     |      |            |            |
| Ninespine       | <i>Pungitius</i>        | Gasterosteidae | 64  | 6.5  | Warm/cold* | Small prey |
| Stickleback     | <i>pungitius</i>        |                |     |      |            |            |
| Iowa Darter     | <i>Etheostoma exile</i> | Percidae       | 13  | 5.0  | Cool       | Small prey |
| Johnny Darter   | <i>Etheostoma</i>       | Percidae       | 39  | 5.0  | Cool       | Small prey |
|                 | <i>nigrum</i>           |                |     |      |            |            |
| Logperch        | <i>Percina caprodes</i> | Percidae       | 180 | 9.0  | Cool/warm  | Small prey |
| Trout-perch     | <i>Percopsis</i>        | Percopsidae    | 302 | 9.0  | Cold       | Small prey |
|                 | <i>omiscomaycus</i>     |                |     |      |            |            |
| Central         | <i>Umbra limi</i>       | Umbridae       | 9   | 7.5  | Cool/warm  | Small prey |
| Mudminnow       |                         |                |     |      |            |            |
| (C) <i>Less</i> |                         |                |     |      |            |            |
| <i>common</i>   |                         |                |     |      |            |            |
| <i>species</i>  |                         |                |     |      |            |            |
| Longnose gar    | <i>Lepisosteus</i>      | Lepisosteidae  | 10  | 76.0 | Warm       | Predator   |
|                 | <i>osseus</i>           |                |     |      |            |            |
| Alewife         | <i>Alosa</i>            | Clupeidae      | 5   | 15.0 | Cold       | Pelagic    |
|                 | <i>pseudoharengus</i>   |                |     |      |            |            |
| Goldeye         | <i>Hiodon alosoides</i> | Hiodontidae    | 6   | 28.0 | Warm       | Pelagic    |
| Mooneye         | <i>Hiodon tergisus</i>  | Hiodontidae    | 13  | 28.0 | Cool/warm  | Pelagic    |
| Rainbow trout   | <i>Oncorhynchus</i>     | Salmonidae     | 4   | 53.0 | Cold       | Pelagic    |
|                 | <i>mykiss</i>           |                |     |      |            |            |
| Round           | <i>Prosopium</i>        | Salmonidae     | 12  | 25.0 | Cold       | Pelagic    |
| whitefish       | <i>cylindraceum</i>     |                |     |      |            |            |
| Bowfin          | <i>Amia calva</i>       | Amiidae        | 9   | 54.0 | Warm       | Littoral   |

|             |                         |              |    |      |           |          |
|-------------|-------------------------|--------------|----|------|-----------|----------|
| Silver      | <i>Moxostoma</i>        | Catostomidae | 21 | 40.0 | Cool      | Littoral |
| Redhorse    | <i>anisurum</i>         |              |    |      |           |          |
| Greater     | <i>Moxostoma</i>        | Catostomidae | 10 | 41.0 | Cool/warm | Littoral |
| Redhorse    | <i>valenciennesi</i>    |              |    |      |           |          |
| Common Carp | <i>Cyprinus carpio</i>  | Cyprinidae   | 14 | 37.0 | Warm      | Littoral |
| Fallfish    | <i>Semotilus</i>        | Cyprinidae   | 13 | 20.0 | Cool      | Littoral |
|             | <i>corporalis</i>       |              |    |      |           |          |
| Yellow      | <i>Ameiurus natalis</i> | Ictaluridae  | 20 | 25.5 | Warm      | Littoral |
| Bullhead    |                         |              |    |      |           |          |

15

16

17

18

19

20

21

22

23

24

25

26

27

28

29 Supplementary Table 2. Species association values, measured as null-adjusted Pearson correlation  
30 coefficients for abundances of 16 species identified as potential ‘interaction’ species by the SEM  
31 analysis (Figs. 1, Suppl. Fig. 3). The association analysis tests the direction and statistical significance  
32 of these ‘interactions’, correcting for bias in zero-inflated data arising because the correlation  
33 coefficient is not double-zero symmetrical<sup>3</sup>. Significantly negative (32/120) pairings are grey or black  
34 highlighted cells. These results cannot test whether the significant associations derive from species  
35 interactions, or if negative associations derive from divergent habitat affinity (e.g., species x is absent  
36 when species y is present, because they prefer different lake conditions). However, by organizing  
37 these results by temperature affinity (BLUE = cold water species, RED = cool, or GREEN = warm),  
38 most negative interactions occur among temperature groups (grey cells) – for example, warm and cold  
39 water species tending not to co-occur. Only five negative species pairings were within- group (black  
40 cells). There were 37/120 positive pairings and 51/120 non-significant pairings – we assumed these  
41 associations to not reflect antagonistic species interactions, and thus could not generate restricted co-  
42 occurrence between the species pairs.

43

| Species      | LNSk | Whthf | BTrt  | Burb  | Cisco | YPer  | Pike  | Wall  | Wsk   | Red   | SMB   | Pmp   | LMB   | RBss  | BBul  |
|--------------|------|-------|-------|-------|-------|-------|-------|-------|-------|-------|-------|-------|-------|-------|-------|
| Lake Trout   | 0.07 | 0.11  | -0.08 | 0.08  | 0.02  | 0.00  | -0.20 | -0.27 | 0.18  | -0.09 | 0.08  | -0.07 | -0.08 | 0.12  | -0.05 |
| LNSucker     |      | 0.28  | 0.22  | -0.02 | 0.00  | -0.05 | -0.09 | -0.08 | 0.13  | -0.03 | -0.08 | -0.03 | -0.02 | -0.03 | -0.04 |
| Whitefish    |      |       | -0.01 | 0.22  | 0.10  | 0.03  | 0.08  | 0.11  | -0.02 | -0.04 | -0.05 | -0.11 | -0.10 | -0.03 | -0.09 |
| Brook Trout  |      |       |       | -0.09 | -0.06 | -0.11 | -0.17 | -0.17 | 0.39  | -0.06 | -0.12 | -0.05 | -0.05 | -0.05 | -0.04 |
| Burbot       |      |       |       |       | 0.15  | 0.02  | 0.00  | 0.16  | -0.04 | 0.01  | 0.01  | -0.07 | -0.02 | -0.01 | -0.05 |
| Cisco        |      |       |       |       |       | 0.16  | 0.30  | 0.25  | 0.05  | 0.02  | 0.04  | -0.03 | 0.01  | -0.02 | 0.06  |
| Yellow Perch |      |       |       |       |       |       | 0.20  | -0.01 | -0.01 | -0.04 | 0.10  | 0.24  | 0.20  | 0.03  | 0.18  |
| Pike         |      |       |       |       |       |       |       | 0.42  | -0.12 | 0.07  | -0.12 | 0.01  | 0.09  | -0.12 | 0.09  |
| Walleye      |      |       |       |       |       |       |       |       | -0.15 | 0.16  | -0.14 | -0.11 | -0.08 | -0.16 | -0.06 |
| White Sucker |      |       |       |       |       |       |       |       |       | -0.07 | -0.17 | -0.05 | -0.08 | -0.08 | -0.05 |
| Redhorse     |      |       |       |       |       |       |       |       |       |       | -0.03 | -0.04 | -0.04 | -0.04 | -0.04 |
| SM Bass      |      |       |       |       |       |       |       |       |       |       |       | 0.31  | 0.18  | 0.30  | 0.12  |
| Pumpkinseed  |      |       |       |       |       |       |       |       |       |       |       |       | 0.27  | 0.08  | 0.27  |
| LM Bass      |      |       |       |       |       |       |       |       |       |       |       |       |       | 0.06  | 0.26  |
| Rock Bass    |      |       |       |       |       |       |       |       |       |       |       |       |       |       | 0.03  |
| Brown        |      |       |       |       |       |       |       |       |       |       |       |       |       |       |       |
| Bullhead     |      |       |       |       |       |       |       |       |       |       |       |       |       |       |       |



45 Supplementary Table 3. Boosted regression tree (BRT) model results, for species with one or more  
46 significantly negative species associations corrected for null expectation (Supplementary Table 2). The  
47 results from the association analysis cannot distinguish between species interactions versus habitat  
48 affinity – the BRT analysis tests the relative influence (%) of 22 possible drivers of variation affecting  
49 the presence of each species, including species composition (the presence of each of the other species)  
50 and abiotic factors including degree days, pH, phosphorus, minimum depth, maximum depth, lake  
51 area, Secchi depth, and small prey species richness. Correlation refers to how much a predictor model  
52 estimates the variation within the raw data (%). The seven grey-shaded cells are the only species  
53 pairings where the explanatory species (top row) was one of the ten strongest factors negatively  
54 associated (see Suppl. Fig. 5) with the presence of the response species (vertical column on the left  
55 side of the table). The species are organized by temperature affinity: blue = cold, green = cool, red =  
56 warm.  
57

| Focal species    | lake whitefish | cisco trout | lake trout | burbot | brook trout | walleye | pike | small mouth bass | yellow perch | rock bass | white sucker | brown bullhead | pumpkin seed | large mouth bass | Degree days | pH | Total P | Depth min (m) | Depth Max (m) | Area (ha) | secchi depth | small prey richness | No. of trees included in final model | Correlation Between observed and predicted response variables |
|------------------|----------------|-------------|------------|--------|-------------|---------|------|------------------|--------------|-----------|--------------|----------------|--------------|------------------|-------------|----|---------|---------------|---------------|-----------|--------------|---------------------|--------------------------------------|---------------------------------------------------------------|
| lake whitefish   |                | 20          | 0.02       | 15     | 0           | 5       | 0.3  | 0.1              | 2            | 0.02      | 1            | 0              | 0.2          | 1                | 22          | 1  | 4       | 1             | 2             | 24        | 1            | 1                   | 750                                  | 76                                                            |
| cisco            | 21             |             | 0          | 0.10   | 1           | 0.10    | 8    | 0.03             | 3            | 0.05      | 0.01         | 0.3            | 0.10         | 0                | 7           | 3  | 3       | 7             | 5             | 28        | 4            | 10                  | 1000                                 | 77                                                            |
| lake trout       | 0              | 0           |            | 0.01   | 1           | 5       | 1    | 0                | 0.01         | 0         | 1            | 0              | 0.03         | 0                | 3           | 2  | 9       | 46            | 24            | 2         | 4            | 0.3                 | 1050                                 | 85                                                            |
| burbot           | 20             | 0           | 0          |        | 0.1         | 0.01    | 1    | 0.3              | 0.3          | 0.1       | 0.1          | 0              | 0.02         | 0.1              | 4           | 3  | 1       | 7             | 34            | 23        | 3            | 2                   | 900                                  | 77                                                            |
| brook trout      | 0              | 0.05        | 6          | 1      |             | 11      | 11   | 5                | 56           | 0.1       | 0            | 0              | 0            | 0                | 3           | 1  | 0.2     | 3             | 1             | 0.5       | 1            | 1                   | 350                                  | 81                                                            |
| pike             | 1              | 4           | 3          | 0.2    | 11          | 24      |      | 0.10             | 22           | 0.5       | 0.4          | 1              | 0.10         | 0.2              | 12          | 3  | 2       | 4             | 2             | 6         | 3            | 1                   | 1400                                 | 82                                                            |
| walleye          | 3              | 0           | 5          | 0      | 0.01        |         | 36   | 4                | 0.07         | 0.5       | 1            | 0              | 0.10         | 0.03             | 12          | 1  | 4       | 2             | 2             | 10        | 1            | 2                   | 1000                                 | 79                                                            |
| small mouth bass | 0.02           | 0.2         | 0.3        | 2      | 3           | 5       | 0.2  |                  | 1            | 8         | 0.00         | 2              | 10           | 0.02             | 39          | 1  | 1       | 4             | 3             | 11        | 4            | 10                  | 1050                                 | 80                                                            |
| yellow perch     | 2              | 2           | 0.2        | 1      | 44          | 0.2     | 14   | 3                |              | 1         | 0.2          | 0.01           | 0.06         | 0                | 10          | 2  | 4       | 4             | 3             | 6         | 2            | 3                   | 1600                                 | 86                                                            |
| rock bass        | 0              | 4           | 0.3        | 0.2    | 0.3         | 2       | 1    | 10               | 3            |           | 0            | 0.05           | 14           | 4                | 39          | 3  | 2       | 3             | 3             | 6         | 3            | 4                   | 1450                                 | 79                                                            |
| white sucker     | 7              | 0           | 5          | 0      | 0.2         | 4       | 0    | 0                | 0.4          | 0         |              | 0              | 3            | 0.3              | 31          | 2  | 1       | 4             | 3             | 37        | 6            | 1                   | 300                                  | 49                                                            |
| brown bullhead   | 0.1            | 0.02        | 0          | 0.05   | 0.04        | 0       | 2    | 1                | 0.01         | 0.1       | 0            |                | 17           | 8                | 60          | 1  | 3       | 1             | 0.4           | 1         | 5            | 0.3                 | 700                                  | 79                                                            |
| Pumpkin seed     | 4              | 0           | 0          | 0      | 0.1         | 0.1     | 0    | 2                | 0.02         | 4         | 0            | 11             |              | 11               | 61          | 1  | 1       | 2             | 1             | 1         | 2            | 1                   | 650                                  | 81                                                            |
| large mouth bass | 0              | 0           | 0          | 2      | 0           | 0       | 0    | 0                | 0            | 2         | 3            | 6              | 7            |                  | 73          | 2  | 2       | 2             | 2             | 3         | 0            | 0                   | 550                                  | 83                                                            |

59 Supplementary Table 4. Environmental range comparisons of the negatively associated species pairs  
 60 identified in Supplementary Table 2. Species AB refers to lakes where both species co-occur. Ten  
 61 pairs had range overlap in environmental factors yet rarely co-occur. Nine pairs had range  
 62 compression in lakes of co-occurrence, where the range of environmental conditions in lakes where a  
 63 species occurs in the absence of the other is wider than when the two species co-occur. BRT refers to  
 64 pairs where the presence of one species significantly and directly predicts the absence of another (see  
 65 Suppl. Table 3, Suppl. Fig. 5). **Cold water species**, **cool water species**, **warm water species** - most  
 66 rarely co-occurring pairs or those with compressed co-occurrence involve species of different  
 67 temperature groupings.

| species pair             | % lakes      | RANGE OVERLAP*                        | RANGE                                         | RANGE                                        | BRT                                               | CO-OCCURRENCE                                         |
|--------------------------|--------------|---------------------------------------|-----------------------------------------------|----------------------------------------------|---------------------------------------------------|-------------------------------------------------------|
|                          | co-<br>occur | Species A vs<br>Species B<br>(ANOSIM) | COMPRESSION†<br>Species A vs AB<br>(PERMDISP) | COMPRESSION<br>Species B vs AB<br>(PERMDISP) | The presence of<br>A predicts B<br>and vice versa | RANKING                                               |
| Brooktrout/Pike          | 0.50%        | 0.138 (0.02%)                         | ns                                            | ns                                           | Yes                                               | <i>species rarely co-<br/>occurring (Fig.<br/>2A)</i> |
| Brooktrout/Walleye       | 0.30%        | 0.150 (0.02%)                         | ns                                            | ns                                           | Yes                                               |                                                       |
| Brooktrout/SMBass        | 0.60%        | 0.193 (0.02%)                         | ns                                            | ns                                           | Yes                                               |                                                       |
| SMBass/LongnoseSucker    | 3.50%        | 0.203 (0.02%)                         | ns                                            | ns                                           |                                                   |                                                       |
| Brooktrout/Burbot        | 1.40%        | 0.293 (0.02%)                         | ns                                            | ns                                           |                                                   |                                                       |
| Brooktrout/Brownbullhead | 1.08%        | 0.361 (0.02%)                         | ns                                            | ns                                           |                                                   |                                                       |
| Brooktrout/LakeTrout     | 4.80%        | 0.381 (0.02%)                         | ns                                            | ns                                           | Yes                                               |                                                       |
| LMBass/Whitefish         | 3.10%        | 0.448 (0.02%)                         | ns                                            | ns                                           |                                                   |                                                       |
| Brooktrout/LMBass        | 0.15%        | 0.565 (0.02%)                         | NA^                                           | NA^                                          |                                                   |                                                       |
| LakeTrout/LMBass         | 4.50%        | 0.641 (0.02%)                         | ns                                            | ns                                           |                                                   |                                                       |
| LakeTrout/Pike           | 27.90%       | 0.318 (0.02%)                         | ns                                            | compressed (p<0.001)                         | Yes                                               | <i>one or both</i>                                    |
| Pike/Rockbass            | 36.40%       | 0.383 (0.02%)                         | ns                                            | compressed p=0.049)                          |                                                   | <i>species occur in a</i>                             |
| Pike/SMBass              | 38.20%       | 0.389 (0.02%)                         | ns                                            | compressed (p=0.008)                         |                                                   | <i>compressed</i>                                     |
| LakeTrout/Pumpkinseed    | 12.20%       | 0.475 (0.02%)                         | ns                                            | compressed (p<0.001)                         |                                                   | <i>range of</i>                                       |
| LakeTrout/Walleye        | 23.70%       | 0.287 (0.02%)                         | compressed (p=0.01)                           | compressed (p<0.001)                         | Yes                                               | <i>environments</i>                                   |

|                            |        |               |                            |                            |     |                                                                           |
|----------------------------|--------|---------------|----------------------------|----------------------------|-----|---------------------------------------------------------------------------|
| Rockbass/Whitefish         | 23.30% | 0.305 (0.02%) | compressed ( $p < 0.001$ ) | compressed ( $p = 0.006$ ) |     | <i>when co-</i>                                                           |
| Burbot/Pumpkinseed         | 9.70%  | 0.348 (0.02%) | compressed ( $p = 0.01$ )  | compressed ( $p < 0.001$ ) |     | <i>occurring,</i>                                                         |
| Whitefish/Pumpkinseed      | 10.50% | 0.363 (0.02%) | compressed ( $p = 0.021$ ) | compressed ( $p < 0.001$ ) |     | <i>compared to</i>                                                        |
| LakeTrout/ShrtnoseRedhorse | 3.70%  | 0.428 (0.02%) | compressed ( $p = 0.003$ ) | compressed ( $p = 0.017$ ) |     | <i>when found alone</i><br>(Fig. 2B)                                      |
| Pike/Whitesucker           | 71.50% | 0.223 (0.10%) | ns                         | ns                         |     | <i>no compression</i>                                                     |
| Pumpkinseed/Walleye        | 7.90%  | 0.276 (0.02%) | ns                         | ns                         |     | <i>of environmental</i>                                                   |
| Rockbass/Walleye           | 36.50% | 0.326 (0.02%) | ns                         | ns                         |     | <i>lake conditions</i>                                                    |
| LMBass/Walleye             | 12.20% | 0.376 (0.02%) | ns                         | ns                         |     | <i>when together</i>                                                      |
| SMBass/Walleye             | 39.60% | 0.407 (0.02%) | ns                         | ns                         |     | <i>compared to</i>                                                        |
| SMBass/Whitesucker         | 45.10% | 0.448 (0.02%) | ns                         | ns                         |     | <i>when alone (Fig.</i>                                                   |
| Whitesucker/Rockbass       | 41.14% | 0.428 (0.02%) | ns                         | ns                         |     | <i>2C)</i>                                                                |
| Brownbullhead/Whitefish    | 6.30%  | 0.425 (0.02%) | ns                         | ns                         |     |                                                                           |
| LMBass/Whitesucker         | 12.90% | 0.448 (0.02%) | ns                         | ns                         |     |                                                                           |
| LongnoseSucker/Pike        | 7.60%  | 0.030 (3.2%)  | expanded ( $p < 0.001$ )   | ns                         |     | <i>species is found</i>                                                   |
| Brooktrout/YellowPerch     | 2.20%  | 0.104 (0.3%)  | expanded ( $p = 0.04$ )    | ns                         | Yes | <i>in a wider range</i>                                                   |
| LongnoseSucker/Walleye     | 6.90%  | 0.123 (0.5%)  | expanded ( $p = 0.017$ )   | ns                         |     | <i>of environmental</i>                                                   |
| WhiteSucker/Walleye        | 69.20% | 0.311 (0.02%) | expanded ( $p = 0.036$ )   | ns                         |     | <i>conditions when</i><br><i>the other is</i><br><i>present (Fig. 2D)</i> |

68 \* Overlap refers to the degree of overlap in the multivariate environmental conditions of lakes where Species A and

69 Species B occur without each other - R values closer to 0 indicate greater similarity in multivariate environmental

70 conditions. Numbers in brackets are the percentage of 5000 randomizations for which an R value as high or higher

71 occurred (i.e., a R value equal or greater to the calculated value less than 5% of the time is considered significant).

72

73 †Compression refers to a significant change in the multivariate spread or range of environmental conditions, with

74 ‘compressed’ meaning that the range is NARROWER when the species is in the presence of the other species compared to

75 when alone; ‘expanded’ means the range is WIDER for lakes with both species present compared to when the species is

76 alone

77

78 ^ The PERMDISP test is not applicable (NA) in this case, because only 1 lake contained both species.

79

80

81

82 Supplementary Figure 1: Bivariate relationships (with linear fits where significant) between total fish

83 diversity and major explanatory drivers of fish occurrences in lakes. These graphs reveal the potential

84 influence of each explanatory factor on fish.

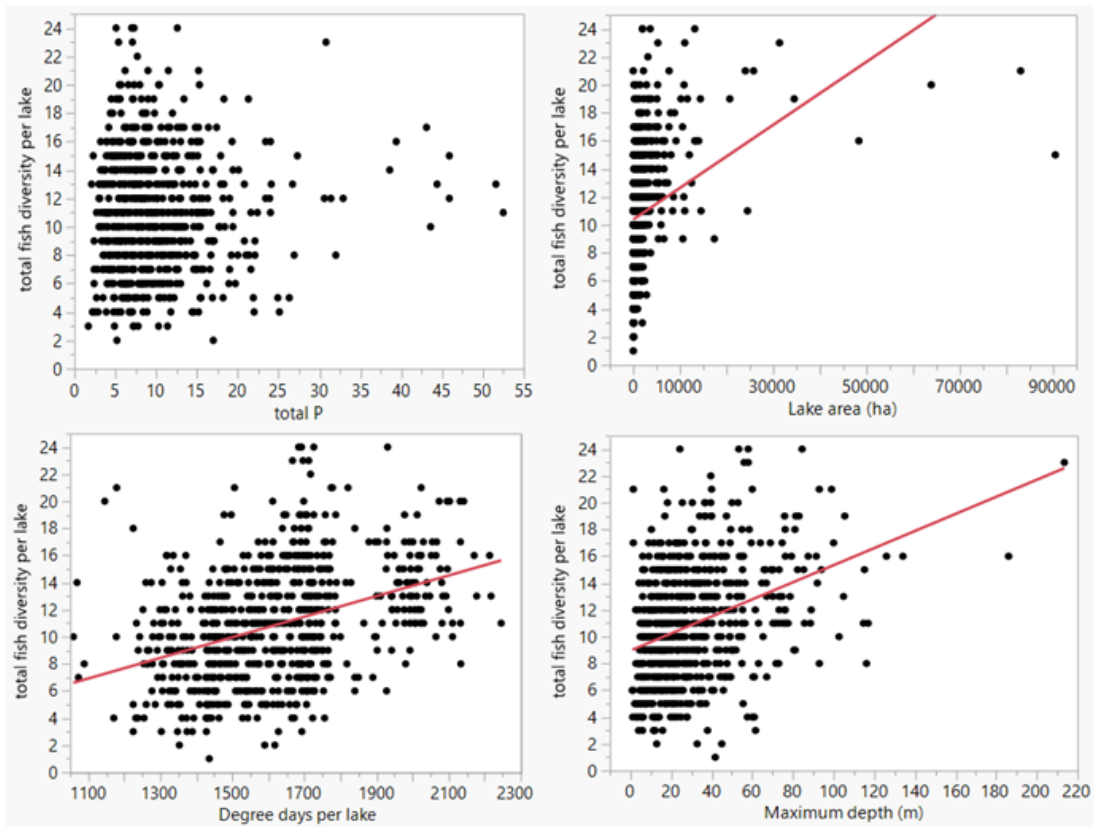

85

86

87

88

89

90 Supplementary Figure 2: Bivariate relationships between abiotic factors in 721 lakes. All relationships  
91 were significant with linear fits shown, except latitude despite the concentration of human populations  
92 in the southern regions of Ontario. Again, these graphs reveal how any given combination of bivariate  
93 factors can significantly interact in lakes, suggesting that integrative analyses testing all  
94 simultaneously should better capture how they affect each other, and by extension, the fish  
95 communities found within.

96

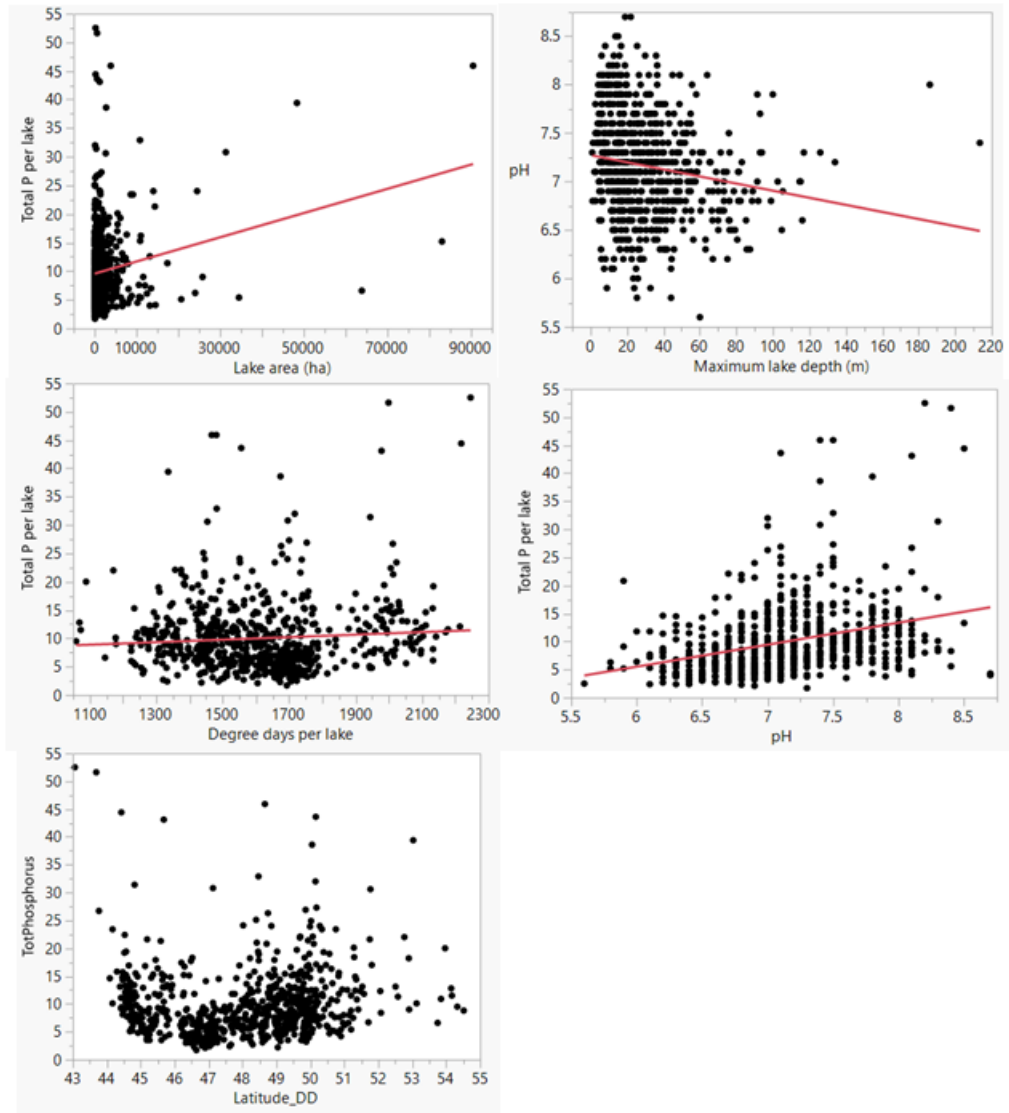

97

98

## 99 **Supplementary Note 1 – Structural Equation Modeling**

100 Our model construction for the SEM analysis began with the entire presence/absence dataset, for  
101 22 fish species in 721 lakes with ten associated environmental measures relating to climate (degree  
102 days), lake morphometry (area [ha], maximum depth [m], mean depth [m]), and lake water quality  
103 (total P concentration, ph, conductivity, dissolved solids, Secchi depth). To minimize strong co-  
104 linearity in our model and maximize parsimony, we screened the correlation matrix among the  
105 environmental variables (e.g., see some correlations displayed in Suppl. Fig. 2). This allowed us to  
106 reduce the number of environmental variables in the SEM from 10 to 5, with these 5 factors  
107 corresponding to our three hypothesized abiotic-based models of influence: climate (degree days), lake  
108 morphometry (lake area, maximum lake depth), and water quality (P, pH). All SEM analyses were  
109 conducted with R 3.1.2 (R Core Team 2016), using the lavaan package version 0.5-20<sup>4</sup>.

110 For the ‘biotic’ components of the SEM, we broadly classified the 22 large-sized species  
111 (average length > 10 cm) into three functional groups based on habitat affinity and foraging strategy as  
112 described in Holm et al.<sup>1</sup> – major predators, littoral species, and pelagic species (Suppl. Table 1). We  
113 also grouped the 28 small-sized species (mean length < 10 cm) into a single functional group “small  
114 prey species”, as described above in the Methods. We tested for influences on total numbers of species  
115 per functional group (‘functional diversity’) and also shifts in species composition (see Methods). For  
116 the latter (composition shifts), we identified which functional groups in the SEM were associated with  
117 significant species composition changes among lakes using PCA analyses on Hellinger transformed  
118 fish data (see Suppl. Fig. 3 and Methods for details). That is to say, which species were significantly  
119 associated with the presence of other species. Finally, to satisfy the SEM assumption of multi-  
120 normality we log-transformed variables with skewed distributions.

121 Our SEM analysis was based on the recognized combined importance of abiotic and biotic  
122 factors in shaping fish diversity in freshwater lakes<sup>5</sup>. Starting from our initial model that incorporated  
123 all levels of interaction among degree days, measures of lake morphometry and water quality, and  
124 numbers of species per major functional group, we used modification indices<sup>4</sup> to guide decisions about  
125 adding missing paths to the model. We used the “modindices” function from the lavaan package<sup>4</sup>,  
126 which provides a list of all missing linkages in the model and the expected effect of additions on  
127 model fit (Maximum likelihood estimator [ $ML_{EST}$ ]). We used the modification indices incrementally,  
128 adding one path at a time, until no modification indices were higher than 2. After this process, we  
129 scanned path regressions and incrementally pruned the less significant ones until there was no more  
130 gain in model fit (decreasing  $ML_{EST}$ <sup>6</sup>). Our final model converged after 171 iterations ( $n = 648$ ,  
131  $ML_{EST} = 4.91$ , Degree of freedom = 13,  $P=0,977$ ).

132 Our SEM analysis focused on the hypothesis that an integrated model capturing abiotic and  
133 biotic interactions within and among functional groups would best capture the regulation of species  
134 richness<sup>5</sup>. Yet, there is also evidence in the fish literature of more singular models shaping the  
135 regulation of richness, specifically (I) top-down regulation by major predators, (II) bottom-up models  
136 where richness in lower levels of the food chain influences diversity levels above, and (III) abiotic-  
137 based models where climate and resources primarily affect species richness at all trophic levels. To  
138 further disentangle the relative contribution of abiotic and biotic associations, we decomposed our  
139 ‘Integrative’ model into its different components each representing a contrasting hypothesis on the  
140 regulation of fish diversity (i.e., no biotic associations between functional groups, top-down  
141 associations only, bottom-up associations only).

142 To make our models comparable we used the same variable structure for all candidate models  
143 but altered the direction of effects among functional groups. The models of ‘Top-down’ effects of



144 consumers on prey (Suppl. Fig. 4b) and the ‘Bottom-up’ effects of prey on consumers (Suppl Fig. 4c)  
145 were started from an initial model including all possible top-down or bottom-up associations among  
146 fish functional groups. The abiotic factors were then added using modification indices and the less  
147 significant regression paths were pruned (using a similar approach as described above). The model  
148 without biotic associations (thereafter ‘Abiotic only’ model) included no effects (arrows) between  
149 functional groups so that only direct effects of environmental factors were possible (Suppl Fig. 4a).  
150 We compared the four models using Akaike Information Criterion (see Suppl. Table 5 and Suppl. Fig.  
151 4). By examining our main ‘Integrative’ model against its reduced components, we were interested in  
152 contrasting the magnitude of each factor in the SEM (effect size) versus its contribution to the overall  
153 fit of the model (e.g., some factors might have large effect size, but not contribute much to our overall  
154 understanding of the system).

155         Results from our model comparison indicate that the model including only abiotic factors  
156 performed the weakest, suggesting that despite being important drivers in terms of effect size, abiotic  
157 factors are insufficient to explain the system (i.e., lowest model fit, Suppl. Table 5). That is to say,  
158 ignoring biotic associations among fish functional groups led to a significant decline in analytical  
159 power (Suppl. Table 5). Alternatively, top-down factors had smaller effect sizes compared to some  
160 abiotic factors yet strongly contributed to model fit. This contribution centered largely on two top-  
161 down associations: from ‘predator PCA1’ to ‘small prey richness’ and from ‘predator richness’ to  
162 ‘pelagic richness’. Removing either of those associations from the ‘Top-Down’ model lead to a jump  
163 in the Maximum Likelihood estimator of 40 and 30 points respectively, sending the model at the  
164 bottom of the ranking in the AICc comparisons. Overall, the ‘Integrative’ model balanced the factors  
165 with the greatest effect sizes while maximizing model fit, including the described top down

166 associations, the strong effects of degree days and lake morphometry, and the bottom-up effect of  
 167 littoral richness on predator richness (Fig. 1).

168 The R code for the SEM analysis is provided in full, in Supplementary Note 4.

169

170 Supplementary Table 5. Comparison of our best model with more simple alternative hypotheses.

| Model       | K  | AICc     | $\Delta$ AICc | Difference support |
|-------------|----|----------|---------------|--------------------|
| Top-down    | 48 | 40119.91 | 0.00          |                    |
| Integrative | 50 | 40120.85 | 0.94          | None               |
| Bottom-up   | 52 | 40130.71 | 10.80         | Strong             |
| Abiotic     | 57 | 40135.64 | 15.73         | Strong             |

171 Critical values for model difference support are: **none**  $\Delta$ AICc < 2; **substantial**  $4 < \Delta$ AICc < 7; and  
 172 **strong**:  $\Delta$ AICc > 10<sup>7</sup>.

173

174

175

176

177

178

179

180

181

182

183

184 Supplementary Figure 3. PCA analysis of Hellinger transformed species associated with significant  
185 shifts in species composition in the SEM model (Fig. 1), divided into three functional groups based on  
186 broad lake habitat associations. The mechanisms underlying the association shifts cannot be  
187 determined by the SEM, and may possibly reflect species interactions, habitat affinity not relating to  
188 species interactions, or some combination of the two. All subsequent analyses tested the likelihood of  
189 interactions versus habitat in explaining these association shifts, targeting these 16 species with the  
190 greatest vector-length separation out of the initial 22 species used in the study.

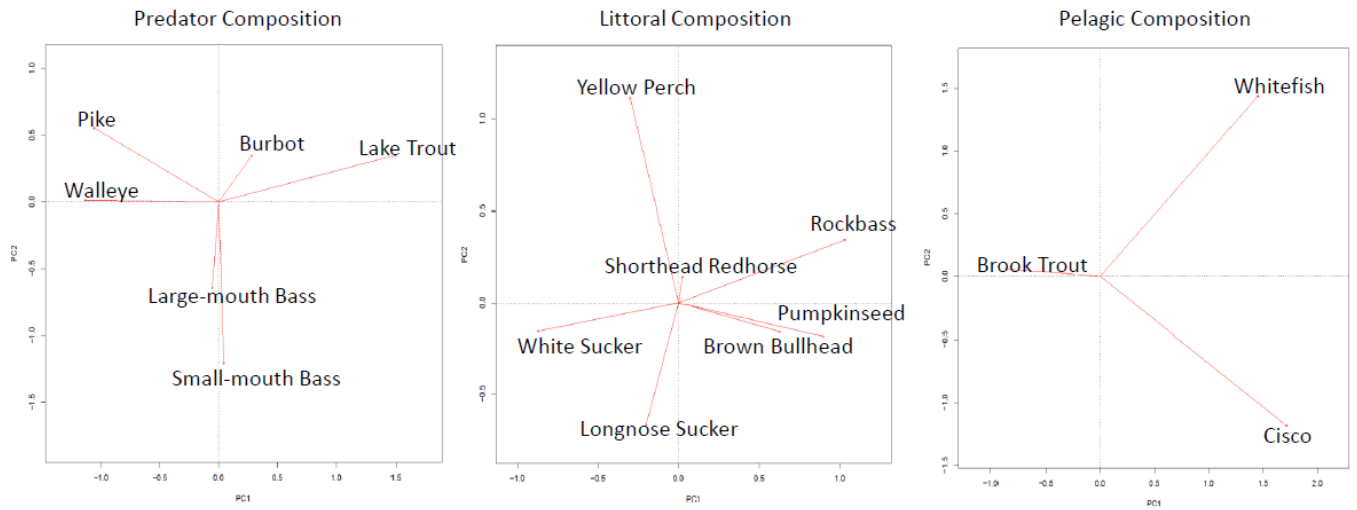

191  
192  
193  
194  
195  
196  
197  
198  
199  
200

201 Supplementary Figure 4. Visual representation of all the alternative hypotheses considered in this  
202 study to explain fish functional group richness and compositional shifts. Each model was built  
203 iteratively with modifications indices<sup>4</sup> starting from an initial model which structure was constrained  
204 by specific rules as a function of the hypothesis tested (see Supplementary Notes 1). The a) Abiotic  
205 only model represents the effects of abiotic factors of fish functional group richness and composition  
206 in the absence of any biotic associations ( $n = 648$ ,  $ML_{EST} = 3.03$ , Degree of freedom = 6,  $P=0.805$ ), b)  
207 Top-down model represents the effects of abiotic factors interacting with top-down associations on  
208 richness and composition ( $n = 648$ ,  $ML_{EST} = 8.66$ , Degree of freedom = 15,  $P=0.895$ ), c) Bottom-up  
209 model represents the effects of abiotic factors interacting with bottom-up associations on richness and  
210 composition ( $n = 648$ ,  $ML_{EST} = 10.04$ , Degree of freedom = 11,  $P=0.527$ ), and d) Integrative model  
211 represents the combined effects of abiotic factors, bottom-up and top-down associations on richness  
212 and composition ( $n = 648$ ,  $ML_{EST} = 4.91$ , Degree of freedom = 13,  $P=0.977$ ).

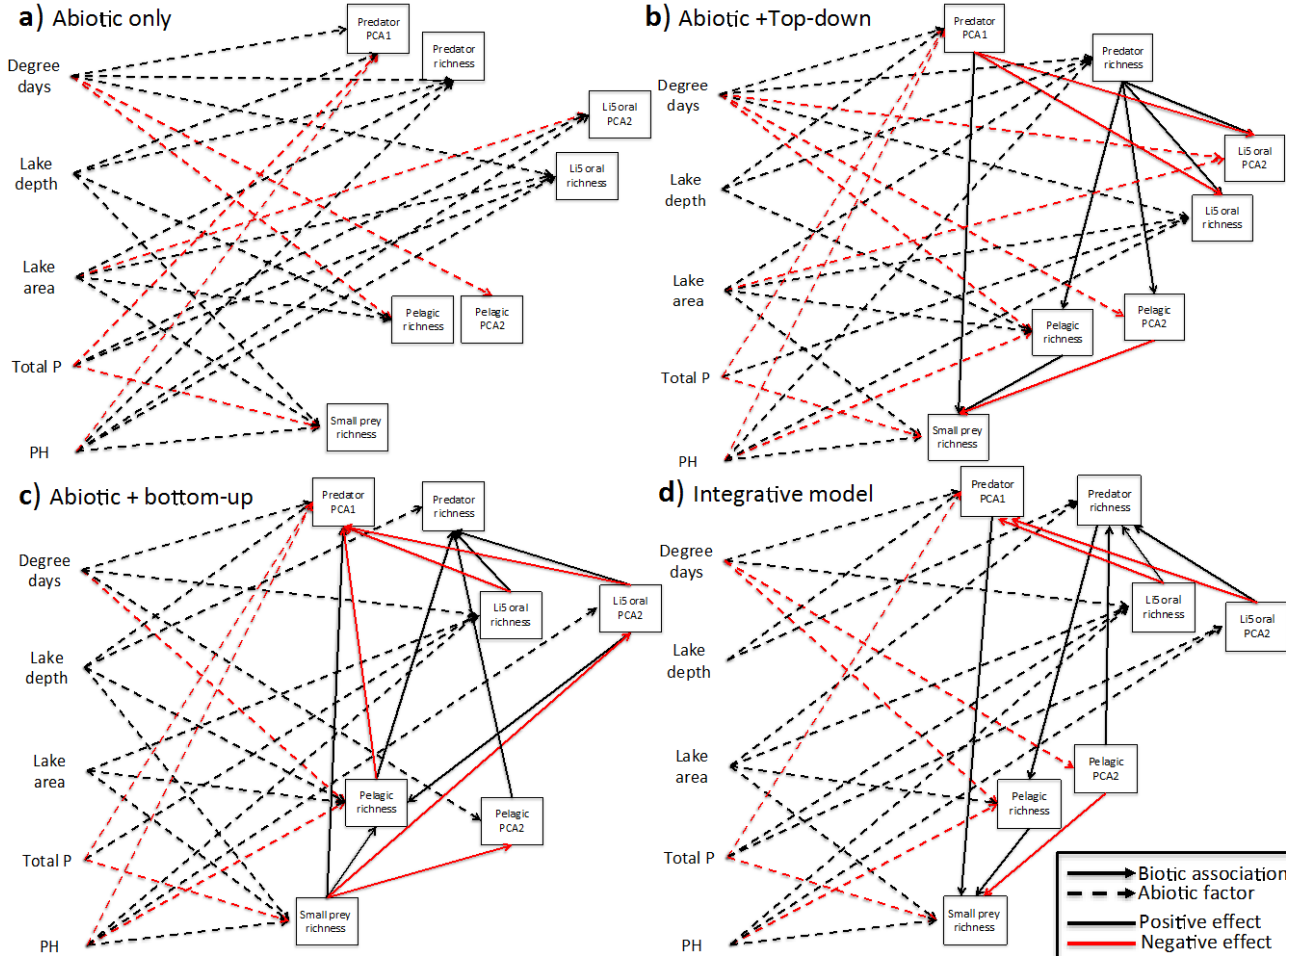

213

214

215

216

217

218

219

220

221

222

## 223 **Supplementary Note 2 - Individual fish species boosted regression tree (BRT) models**

224 We developed BRT models<sup>8</sup> to assess the relative importance of 22 biotic and abiotic predictor  
225 variables for explaining the variation in fish species presence in lakes for 14 of the fish species, i.e.  
226 brown bullhead, pumpkin seed, walleye, lake whitefish, pike, cisco, yellow perch, rock bass, white  
227 sucker, large-mouth bass, lake trout, small-mouth bass, burbot, and brook trout. In the model  
228 developed for each species, we included presence data for the other 13 species to look for possible  
229 species relationships, as well as a biotic predictor of the species richness of small prey and seven  
230 abiotic characteristics of the lakes, i.e. degree days, pH, phosphorous levels, minimum depth of water,  
231 maximum depth of water, area of the lake, and Secchi depth.

232 All models were fitted in R statistical computing program V. 3.2.1 using the gbm package  
233 version 2.1.1<sup>9</sup>. BRT models are simple classification or rule-based models that partition observations  
234 into groups based on similar values in the response variables using binary splits that are based on  
235 predictor variables<sup>10</sup>. The boosting algorithm then iteratively develops a final model using a forward  
236 stage-wise approach that progressively adds trees to the model. BRT models are advantageous for  
237 analyzing our data because they can be used to assess different types of predictor variables in the same  
238 model, which fits our questions well<sup>11</sup>. We used a tree complexity rate of two (which allows for  
239 possible two way interactions) and a learning rate of 0.05 to allow for a suitable predictive  
240 performance<sup>10</sup>. Because response variables were based on presence and absence data from surveys  
241 conducted within each of the lakes we used a Bernoulli distribution. We show the relative influence of  
242 each of the 22 possible predictors of variation in the presence of the 14 fish species in Suppl. Table 3.  
243 We also show the number of trees included in the final model and estimates of the correlation between  
244 the observed and predicted response variables. Variation in the presence of the different fish species  
245 predicted by each BRT model is shown in Suppl. Figure 5, where values are predicted for each

246 variable by keeping all other variables at mean values.

247

248

249

250

251

252

253

254

255

256

257

258

259

260

261

262

263

264

265

266

267

268 Supplementary Figure 5: The BRT tests if the occurrence of a species was associated with significant  
 269 negative changes in the occurrence of the target species, versus all abiotic factors used in our analyses.  
 270 Only two target species – brook trout (A) and lake trout (B) showed negative relationships versus the  
 271 occurrence of other species, indicated by the red boxes. These data are the same as shown  
 272 in Suppl. Fig. 3. Negative relationships are indicated by declining slopes, with the x-axis ranging from  
 273 0 (absent) the 1 (present). For the remaining 14 species tested with the BRT (Suppl. Fig. 3), all major  
 274 drivers of occurrence were abiotic.

275

276 (A)

277

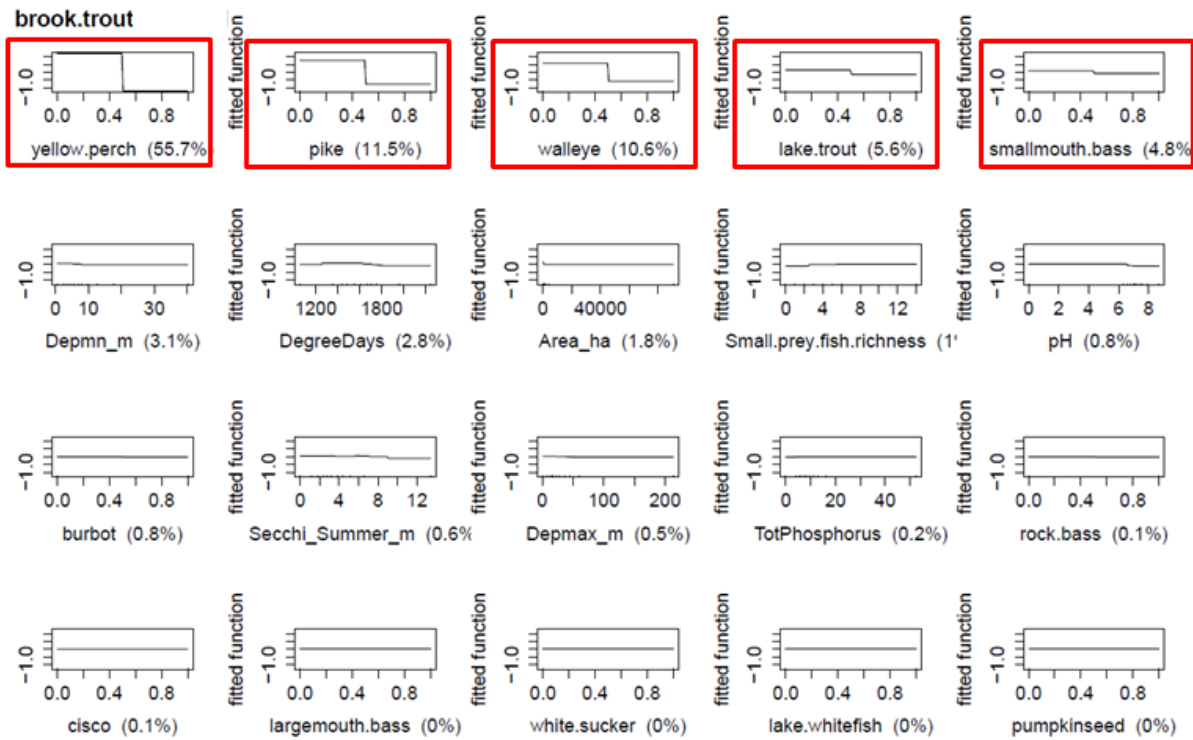

278

279

280 (B)



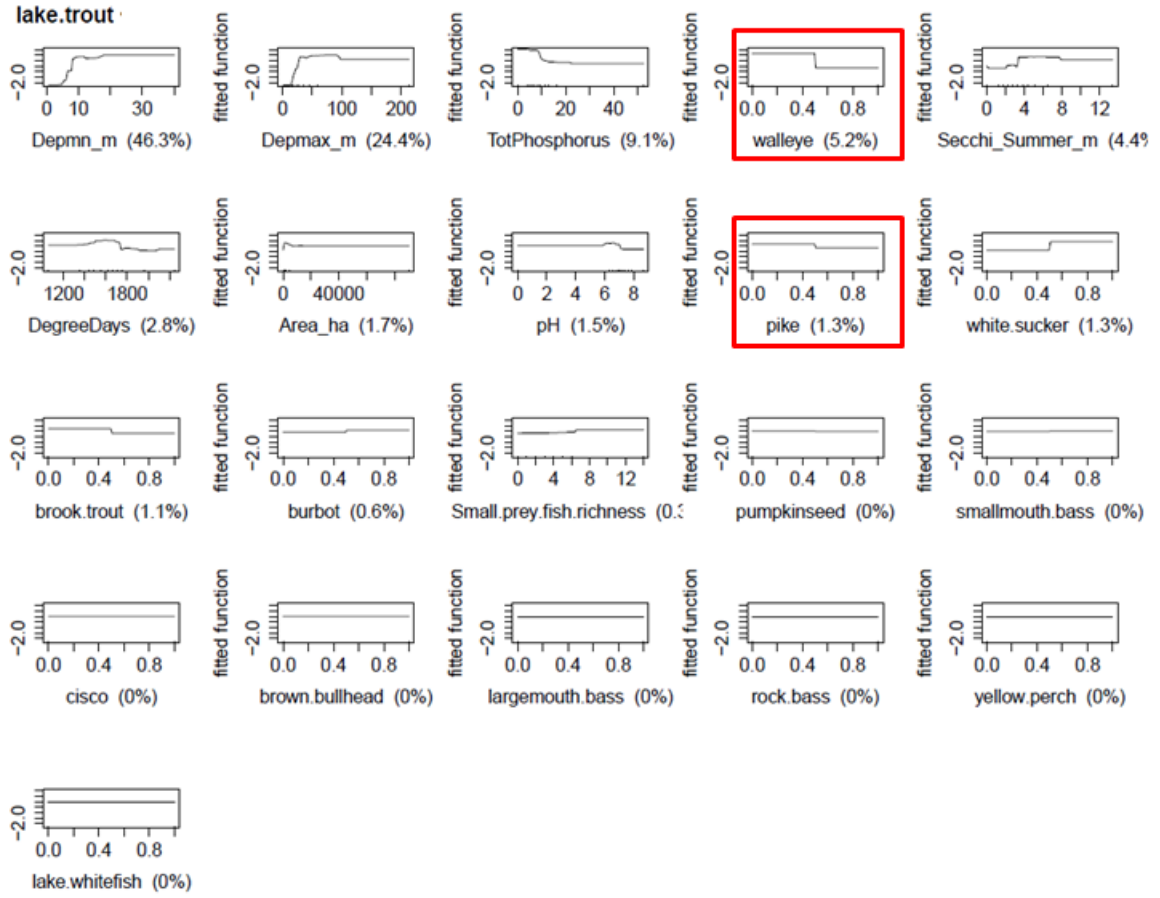

281

282

283

284

285

286

287

288

289

290

291

292 **Supplementary Note 3 - Multivariate analyses of environmental conditions for species pair**  
293 **combinations**

294 For all species pairs, we calculated the Euclidian distance between three lake combinations  
295 (Species A only, Species B only, both) based on seven of the measured abiotic/biogeographic factors  
296 that were minimally inter-correlated. These factors are lake area, maximum depth of the lake, summer  
297 Secchi depth, conductivity, pH, total phosphorus, and degree days. We eliminated lakes for which one  
298 or more of these factors were not measured, leaving 649 of 721 lakes. We log transformed and  
299 normalized all variables before the analysis.

300 To determine the overall degree of overlap in environmental space between lakes with species  
301 A only versus lakes with species B only, we used an ANOSIM analysis<sup>12</sup>. This analysis tests the null  
302 hypothesis that there are no differences in terms of multivariate environmental conditions, and is  
303 equivalent to a non-parametric MANOVA, with permutation to test for significance<sup>12</sup>. The test  
304 computes the R statistic, which ranges from 0 (complete overlap in environmental space) to 1  
305 (complete separation in environmental space). As recommended by Clarke et al. (2014)<sup>12</sup>, we  
306 considered the pairwise test between lakes with species A only versus lakes with species B only after  
307 confirming that the global ANOSIM test (considering all lake types: species A only, species B only,  
308 both A and B, and neither) was significant. This was true in all cases. In all cases we used 5,000  
309 random permutations to test for significant differences.

310 If a difference in multivariate environmental conditions was found via the ANOSIM analysis  
311 above, it could be due to a shift in location (multivariate average of environmental conditions) and/or a  
312 difference in dispersion (multivariate variation or range of environmental conditions). To test for the  
313 latter possibility, we determined for each species pair whether lakes with both species co-occurring  
314 had a reduced range of environmental conditions compared to lakes with species A only or species B

315 only. This could happen, for example, if a subordinate competitor or prey species can only co-occur  
 316 with a dominant competitor or predator in deep and large lakes, with those lake conditions allowing  
 317 the subordinate more possibilities to persist. Relatedly, we would predict that the subordinate could  
 318 occur in smaller and shallower lakes, if the dominant species is absent from those lakes. To do this, we  
 319 used a test of difference in multivariate dispersions (PERMDISP<sup>13</sup>). This is a multivariate extension of  
 320 Levene's test, measuring the average distance from each lake to the centroid of the group of lakes in  
 321 the same category, and comparing this average distance between different categories<sup>14</sup>. If coexistence  
 322 of species A and B is limited to a smaller range of environmental conditions than lakes inhabited by  
 323 species A without species B, then we would expect to find a significant decline in multivariate  
 324 dispersion of lakes with both species compared to lakes with species A only. This test also uses  
 325 permutation to determine significance of the test. We again set the number of permutations to 5,000.  
 326 We note that for species pairs where the number of lakes containing both species was very small, our  
 327 power to detect differences in multivariate dispersion was likely limited. For both the ANOSIM and  
 328 PERMDISP analyses we used the program PRIMER<sup>14</sup>. These tests are also available in the 'vegan'  
 329 package in R, but R does not allow pairwise tests in the ANOSIM function.

330 To visualize the similarity among lakes in terms of their environmental conditions, we used  
 331 PCA to ordinate all lakes in environmental space. We used the 'vegan' package in R to create  
 332 ordination plots, with vectors to visualize the correlation of each environmental factor with the first  
 333 two PCA axes.

334

#### 335 **Supplementary Note 4 – R code for SEM analysis**

336

```

337 #.....#
338 #.....BSM project (SEM).....#
339 #.....#
  
```

```

340 #.....
341 #
342 #... Collaborators: Andrew MacDougall et al#
343 #
344 #... Author of the script: Eric Harvey (http://ericharvey.weebly.com/)
345 #
346 #... Creation date: January 05 2016
347 #
348 #... Latest edits: November 07 2016
349 #
350 #.....
351 #
352 #... Clear variables
353 rm(list=ls())
354 #... Directories paths
355 datapath = "~/Documents/Research/1.Projects/3.BSM_project/3.Analysis/"
356 #...Load needed packages
357 library(vegan)
358 library(ade4)
359 library(lavaan)
360 library(corrplot)
361 #... Load the data
362 setwd(datapath)
363 presence.dat = read.delim("BSM_presence.txt")
364 presence.dat = na.omit(presence.dat)
365 #... Identify species of interest for each functional group
366 predator.of.interest =
367 c("walleye","lake.trout","pike","smallmouth.bass","largemouth.bass","burbot")
368 benthopelagic.species = c("cisco","brook.trout","round.whitefish","lake.whitefish")
369 bentholitoral.species =
370 c("shorthead.redhorse","silver.redhorse","goldeye","longnose.sucker","white.sucker","br
371 own.bullhead","channel.catfish","yellow.bullhead","black.crappie","bluegill","pumpkinsee
372 d","rock.bass","yellow.perch","mooneye","fallfish")
373 smallprey.species = c("blackchin.shiner","blacknose.shiner","bluntnose.minnow",
374 "brook.stickleback","central.mudminnow","common.shiner",
375 "creek.chub","deepwater.sculpin","eastern.blacknose.dace",
376 "emerald.shiner","fathead.minnow","finescale.dace",
377 "golden.shiner","iowa.darter","johnny.darter","lake.chub",
378 "logperch","longnose.dace","mimic.shiner","Mottled.Sculpin","ninespine.stickleback",
379 "northern.redbelly.dace","Pearl.dace","sculpin.spp","Slimy.Sculpin",
380 "spoonhead.sculpin","spottail.shiner","trout.perch")
381 #... Generate presence/absence matrix with species of interest
382 pred.comp.mat = presence.dat[,predator.of.interest]
383 pelagic.comp.mat = presence.dat[,benthopelagic.species]
384 littoral.comp.mat = presence.dat[,bentholitoral.species]
385 smallprey.comp.mat = presence.dat[,smallprey.species]
386 #####
387 #####

```

```

388 #...Extract variables for SEM
389 #.....Ordinations analyses for compositional shifts
390 #.....Change in species composition with PCA
391 pred.PCA = rda(decostand(pred.comp.mat,"hell"))
392 pelagic.PCA = rda(decostand(pelagic.comp.mat,"hell"))
393 litoral.PCA = rda(decostand(litoral.comp.mat,"hell"))
394 #.....PCA results
395 pred.PCA
396 cumsum(pred.PCA$CA$eig/sum(pred.PCA$CA$eig)*100)
397 pelagic.PCA
398 cumsum(pelagic.PCA$CA$eig/sum(pelagic.PCA$CA$eig)*100)
399 litoral.PCA
400 cumsum(litoral.PCA$CA$eig/sum(litoral.PCA$CA$eig)*100)
401 #.....PCA diagnosis plots
402 source ('http://www.davidzeleny.net/anadat-r/doku.php/en:numecolr:cleanplot.pca?
403 do=export_code&codeblock=0')
404 cleanplot.pca(pred.PCA)
405 cleanplot.pca(pelagic.PCA)
406 cleanplot.pca(litoral.PCA)
407 dev.off()
408 #define "evplot" function first:
409 source ("http://www.davidzeleny.net/anadat-r/doku.php/en:numecolr:evplot?
410 do=export_code&codeblock=0")
411 # select the data frame with eigenvalues of particular axes:
412 ev.pred <- pred.PCA$CA$eig
413 ev.pelagic <- pelagic.PCA$CA$eig
414 ev.litoral <- litoral.PCA$CA$eig
415 # calculate axis-importance and draw the barplots:
416 evplot (ev.pred)
417 evplot (ev.pelagic)
418 evplot (ev.litoral)
419 dev.off()
420 #.....Create variables for SEM
421 #.....Axes representing changes in species composition
422 pred.PCA1 = scores(pred.PCA)$sites[,1]
423 pred.PCA2 = scores(pred.PCA)$sites[,2]
424 pelagic.PCA1 = scores(pelagic.PCA)$sites[,1]
425 pelagic.PCA2 = scores(pelagic.PCA)$sites[,2]
426 litoral.PCA1 = scores(litoral.PCA,choices=c(1:4))$sites[,1]
427 litoral.PCA2 = scores(litoral.PCA,choices=c(1:4))$sites[,2]
428 #.....Species richness per functional group
429 pred.richness = specnumber(pred.comp.mat)
430 small.prey.richness = specnumber(small.prey.comp.mat)
431 pelagic.richness = specnumber(pelagic.comp.mat)
432 litoral.richness = specnumber(litoral.comp.mat)
433 #.....Environmental variables
434 #.....Geo
435 Latitude = presence.dat$Latitude_DD

```

```

436 Longitude = presence.dat$Longitude_DD
437 DD = presence.dat$DegreeDays
438 #.....Morphology
439 Area = presence.dat$Area_ha
440 Perimeter = presence.dat$Perimeter_km
441 Depth = presence.dat$Depmn_m
442 Depth.max = presence.dat$Depmax_m
443 #.....Productivity
444 Secchi = presence.dat$Secchi_Summer_m
445 Conductivity = presence.dat$Conductivity..uS.cm.s.
446 TDSolids = presence.dat$TDSolids_mgL
447 TotPhosphorus = presence.dat$TotPhosphorus
448 PH = presence.dat$pH
449 #####
450 #####
451 #...Correlations among variables
452 #Among biotic factors
453 biotic.cor =
454 cor(cbind(litoral.PCA1,litoral.PCA2,pelagic.PCA1,pelagic.PCA2,pred.PCA1,pred.PCA2,
455 pred.richness,litoral.richness,pelagic.richness,small.prey.richness))
456 corrrplot(biotic.cor,method="number",type="full")
457 #Among environmental variables
458 env.cor =
459 cor(na.omit(cbind(Latitude,Longitude,DD,Area,Perimeter,Depth,Secchi,Conductivity,TD
460 Solids,TotPhosphorus,PH)))
461 corrrplot(env.cor,method="number",type="full")
462 #####
463 #####
464 #...Data frame for SEM ananalysis
465 #.....variables are log transformed if necessary
466 #.....variables need to be all at the same variance scale - to achieve this some are
467 divided/multiplied by a factor of 10 or 100
468 data.mod = data.frame(DD/100,Latitude,
469 Area/1000,Perimeter/100,Depth,
470 Secchi,TotPhosphorus,Conductivity/10,PH,TDSolids/10,
471 as.numeric(pred.richness),as.numeric(small.prey.richness),pelagic.richness,litoral.richne
472 ss,
473 pred.PCA1*100,pred.PCA2*100,pelagic.PCA1*100,pelagic.PCA2*100,litoral.PCA1*100,
474 litoral.PCA2*100)
475 colnames(data.mod) = c("DD","Latitude",
476 "Area","Perimeter","Depth",
477 "Secchi","TotPhosphorus","Conductivity","PH","TDSolids",
478 "pred.richness","small.prey.richness","pelagic.richness","litoral.richness",
479 "pred.PCA1","pred.PCA2","pelagic.PCA1","pelagic.PCA2","litoral.PCA1","litoral.PCA2")
480 #.....Correlation matrix of the data
481 round(cov2cor(cov(data.mod)),3)
482 #####
483 #####

```

```

484 #...Structural equation models
485 #Each model is built by starting from a simplified model from which paths are
486 sequentially added based on the modification indices until no modification indices are
487 >2.
488 #The initial simplified model for each alternative model is built as follow:
489 #Model 1 - Abiotic factors only
490 #Model 2 - Top-down regulation: Initial model was only top-down interactions and then
491 abiotic factors are added sequentially
492 #Model 3 - Bottom-up regulation: Initial model was only bottom-up interactions and then
493 abiotic factors are added sequentially
494 #Model 4 - Integrative model (main model from the paper): Abiotic + Top-down +
495 Bottom-up (based on our initial meta-model - see Supp.Mat)
496 #If the modification indice proposed to add a path that is forbidden according to the
497 model (e.g., between trophic groups in the abiotic model), the proposition is ignored and
498 the next best proposition is implemented.
499 #If the modification indice value of adding a path between an abiotic factor and a
500 functional group is the same as the value of adding a path between said trophic group
501 and another trophic group, then it was interpreted as a signal that the effect of said
502 abiotic factor might be mediated by a trophic interaction
503 library(semTools)
504 #.....Model 1 --> Model with only abiotic factors
505 BSM.mod1 <- "
506 # Regression
507 small.prey.richness ~ DD + PH + Area + TotPhosphorus + Depth
508 pelagic.richness ~ DD + PH + Depth + Area + TotPhosphorus
509 pelagic.PCA2 ~ DD + TotPhosphorus
510 littoral.richness ~ DD + Area + TotPhosphorus + PH + Depth
511 littoral.PCA2 ~ DD + Area + PH + TotPhosphorus
512 pred.richness ~ PH + Depth + Area + DD
513 pred.PCA1 ~ DD + PH + TotPhosphorus + Depth
514 "
515 BSM.mod1.fit = sem(BSM.mod1,data=data.mod) #run the SEM
516 BSM.mod1.fit #visualize fitting results
517 summary(BSM.mod1.fit,stand=T,rsq=T) #visualize path coefficients
518 modindices(BSM.mod1.fit) #modification indices
519 # To inspect model estimates and parameters
520 varTable(BSM.mod1.fit) #Variance table
521 inspect(BSM.mod1.fit,"cov.ov") #co-variance matrix
522 inspect(BSM.mod1.fit,"est") #regression estimates
523 #
524 #.....Model 2 Top-down regulation --> paths only from higher to lower trophic groups +
525 abiotic factors
526 #Notice that Depth - a factor that was very important in Model 1 is now mainly important
527 for top-predators - it suggests that the effect of depth on other groups is mediated by
528 top-predators
529 BSM.mod2 <- "
530 # Regression
531 small.prey.richness ~ pred.PCA1 + pred.richness + pelagic.richness + pelagic.PCA2 +

```

```

532 litoral.richness + PH + Area + TotPhosphorus
533 pelagic.richness ~ pred.richness + DD + Depth + PH + Area + TotPhosphorus +
534 pred.PCA1
535 pelagic.PCA2 ~ pred.richness + litoral.richness + DD
536 litoral.richness ~ pred.richness + pred.PCA1 + DD + TotPhosphorus + Area + PH
537 litoral.PCA2 ~ pred.richness + pred.PCA1 + DD + Area + pelagic.PCA2
538 pred.richness ~ PH + Depth + Area + DD
539 pred.PCA1 ~ DD + PH + TotPhosphorus + Depth
540 # Residual correlations
541 pred.richness ~~ pred.PCA1
542 pelagic.richness ~~ pelagic.PCA2
543 litoral.richness ~~ litoral.PCA2
544 "
545 BSM.mod2.fit = sem(BSM.mod2,data=data.mod)
546 BSM.mod2.fit
547 summary(BSM.mod2.fit,stand=T,rsq=T)
548 modindices(BSM.mod2.fit)
549 # To inspect model estimates and parameters
550 varTable(BSM.mod2.fit) #Variance table
551 inspect(BSM.mod2.fit,"cov.ov") #co-variance matrix
552 inspect(BSM.mod2.fit,"est") #regression estimates
553 #
554 #.....Model 3 Bottom-up regulation --> Ppaths only from lower to higher trohic groups+
555 abiotic factors
556 BSM.mod3 <- "
557 # Regression
558 small.prey.richness ~ PH + Depth + Area + TotPhosphorus
559 pelagic.richness ~ small.prey.richness + DD + Depth + PH + Area + litoral.PCA2
560 pelagic.PCA2 ~ small.prey.richness + litoral.richness + Area + DD + TotPhosphorus
561 litoral.richness ~ small.prey.richness + DD + TotPhosphorus + Area + PH
562 litoral.PCA2 ~ small.prey.richness + DD + PH
563 pred.richness ~ small.prey.richness + pelagic.richness + pelagic.PCA2 + litoral.richness
564 + litoral.PCA2 + Depth + DD + Area + TotPhosphorus
565 pred.PCA1 ~ small.prey.richness + pelagic.richness + pelagic.PCA2 + litoral.richness +
566 litoral.PCA2 + Depth + DD + TotPhosphorus + PH
567 # Residual correlations
568 pred.richness ~~ pred.PCA1
569 pelagic.richness ~~ pelagic.PCA2
570 litoral.richness ~~ litoral.PCA2
571 pelagic.richness ~~ litoral.richness
572 "
573 BSM.mod3.fit = sem(BSM.mod3,data=data.mod)
574 BSM.mod3.fit
575 summary(BSM.mod3.fit,stand=T,rsq=T)
576 modindices(BSM.mod3.fit)
577 # To inspect model estimates and parameters
578 varTable(BSM.mod3.fit) #Variance table
579 inspect(BSM.mod3.fit,"cov.ov") #co-variance matrix

```



```

580 inspect(BSM.mod3.fit,"est") #regression estimates
581 #
582 #.....Model 4 Integrative model (main model from our meta-model) --> Abiotic factors +
583 top-down + bottom-up
584 BSM.mod4 <- "
585 # Regression
586 small.prey.richness ~ PH + Area + TotPhosphorus + pred.PCA1 + pelagic.richness +
587 pelagic.PCA2
588 pelagic.richness ~ DD + PH + Depth + Area + TotPhosphorus + pred.richness
589 pelagic.PCA2 ~ DD + TotPhosphorus + pred.richness
590 littoral.richness ~ DD + Area + TotPhosphorus + PH + pred.richness
591 littoral.PCA2 ~ DD + Area + PH + TotPhosphorus
592 pred.richness ~ PH + Depth + littoral.richness + littoral.PCA2 + pelagic.richness +
593 pelagic.PCA2 + TotPhosphorus + small.prey.richness + Area
594 pred.PCA1 ~ DD + PH + TotPhosphorus + Depth + littoral.richness + littoral.PCA2
595 # Residual correlations
596 littoral.richness ~~ littoral.PCA2
597 pelagic.richness ~~ pelagic.PCA2
598 pred.richness ~~ pred.PCA1
599 littoral.richness ~~ small.prey.richness
600 "
601 BSM.mod4.fit = sem(BSM.mod4,data=data.mod)
602 BSM.mod4.fit
603 summary(BSM.mod4.fit,stand=T,rsq=T)
604 modindices(BSM.mod4.fit) #modification indices
605 resid(BSM.mod4.fit,type="raw")
606 # To inspect model estimates and parameters
607 varTable(BSM.mod4.fit) #Variance table
608 inspect(BSM.mod4.fit,"cov.ov") #co-variance matrix
609 inspect(BSM.mod4.fit,"est") #regression estimates
610 #
611 #####
612 #Model goodness of fit and comparison
613 #####
614 #AIC comparisons
615 library(AICcmodavg)
616 aictab(list(BSM.mod1.fit,BSM.mod2.fit,BSM.mod3.fit,BSM.mod4.fit),c("Abiotic","TD","BU
617 ","Integrative"))
618 # Model selection based on AICc:
619 #
620 # K AICc Delta_AICc AICcWt Cum.Wt LL
621 # TD 48 40119.91 0.00 0.61 0.61 -20008.03
622 # Integrative 50 40120.85 0.94 0.38 1.00 -20006.15
623 # BU 52 40130.71 10.80 0.00 1.00 -20008.72
624 # Abiotic 57 40135.64 15.73 0.00 1.00 -20005.22
625 #After removing 'Predator PCA1 --> 'Small prey richness' from the 'Top-down' model
626 # Model selection based on AICc:
627 #

```

628 # K AICc Delta\_AICc AICcWt Cum.Wt LL  
 629 # Integrative 50 40120.85 0.00 0.99 0.99 -20006.15  
 630 # BU 52 40130.71 9.86 0.01 1.00 -20008.72  
 631 # Abiotic 57 40135.64 14.79 0.00 1.00 -20005.22  
 632 # TD 47 40157.95 37.10 0.00 1.00 -20028.22  
 633 #After removing 'Predator richness' --> 'Pelagic richness' from the 'Top-down model'  
 634 # K AICc Delta\_AICc AICcWt Cum.Wt LL  
 635 # Integrative 50 40120.85 0.00 0.99 0.99 -20006.15  
 636 # BU 52 40130.71 9.86 0.01 1.00 -20008.72  
 637 # Abiotic 57 40135.64 14.79 0.00 1.00 -20005.22  
 638 # TD 47 40150.85 30.00 0.00 1.00 -20024.66  
 639 #Observations on AIC comparisons  
 640 # 1. Abiotic only is last  
 641 # 2. The difference between TD and ALL is not substantial  
 642 # 3. The difference between TD/ALL and BU/Abiotic is substantial  
 643 # 4. It is important to note that no interactions in the TD model does not indicate  
 644 of actual top-down interactions (none of them are negative!) except for one strong topdown  
 645 interaction between top-predators and small prey richness  
 646 # 5. In the context of observation #4 - It seems that the only reason why BU does not  
 647 perform well is because it is lacking the very important top-down effect of top-predators  
 648 on small prey richness  
 649 # 6. Observation #5 can be verified easily by removing the top-down path from toppredators  
 650 to small prey richness in the top-down model ( 'Predator PCA1' --> 'Small  
 651 prey richness':ML increases by 40 points and the P-value = 0.0000, 'Predator richness' --  
 652 > 'Pelagic richness': ML increase 33 points) - therefore the good fit of the dop-down  
 653 model is driven by this keystone interaction in the model  
 654 #Conclusion:  
 655 # 1. A mixture of all variables is essential to understand the system. Both bottom-up  
 656 and top-down effects are very important, and in many case they seem to mediate the  
 657 effect of abiotic factors (e.g., Lake depth).  
 658 # 2. Thus, Model 4 is confidently the best model to understand the system because it  
 659 integrates all information and the mediated effects in the most parsimonious way  
 660 # 3. Model 4 could be analyzed further to gain better insights about the system.  
 661 #END  
 662 #####

663

## 664 **Supplementary References**

665

- 666 1. Holm, E., Mandrak, N. E., & Burrige, M. E. (2010). Freshwater fishes of Ontario. *Royal*  
 667 *Ontario Museum, Toronto.*

- 668 2. Hasnain, S. S., Shuter, B. J., & Minns, C. K. (2013). Phylogeny influences the relationships  
669 linking key ecological thermal metrics for North American freshwater fish species. *Canadian*  
670 *Journal of Fisheries and Aquatic Sciences*, 70, 964-972.
- 671 3. Legendre, P., and de Cácares, M. 2013. Beta diversity as the variance of community data:  
672 dissimilarity coefficients and partitioning. *Ecology Letters*, 16: 951-963.
- 673 4. Rosseel, Y. 2012. lavaan: An R package for structural equation modeling. *Journal of statistical*  
674 *software* 48:1–36
- 675 5. Jackson, D. A., Peres-Neto, P. R., & Olden, J. D. (2001). What controls who is where in  
676 freshwater fish communities the roles of biotic, abiotic, and spatial factors. *Canadian journal*  
677 *of fisheries and aquatic sciences*, 58(1), 157-170.
- 678 6. Grace, J. B., D. R. Schoolmaster, G. R. Guntenspergen, A. M. Little, B. R. Mitchell, K. M.  
679 Miller, and E. W. Schweiger. 2012. Guidelines for a graph-theoretic implementation of  
680 structural equation modeling. *Ecosphere* 3:art73.
- 681 7. Burnham, K. P., and D. R. Anderson. 2002. *Model Selection and Multimodel Inference: A*  
682 *Practical Information-Theoretic Approach*. Springer Science & Business Media.
- 683 8. Friedman, J.H. 2001. Greedy function approximation: the gradient boosting machine. *Annal*  
684 *Stat.* 29:1189-1232.
- 685 9. R Development Core Team (2013). *R: language and environment for statistical computing*. R.  
686 F. f. S. Computing. Vienna, Austria, <http://www.R-project.org/>.
- 687 10. Ridgeway 2015 Package GBM. CRAN <http://code.google.com/p/gradientboostedmodels/>
- 688 11. Elith, J., Kearney, M., & Phillips, S. (2010). The art of modelling range-shifting species.  
689 *Methods in ecology and evolution*, 1(4), 330-342.

- 690 12. Clarke, K.R., Gorley, R.N., Somerfield, P.J., Warwich, R.M. (2014) Change in marine  
691 communities: an approach to statistical analysis and interpretation, 3<sup>rd</sup> edition. PRIMER-E:  
692 Plymouth, UK.
- 693 13. Anderson, M.J., Ellingsen, K.E. & McArdle, B.H. (2006) Multivariate dispersion as a measure  
694 of beta diversity. *Ecology Letters*, 9, 683–693.
- 695 14. Anderson, M.J., Gorley, R.N. & Clarke, K.R. (2008) PERMANOVA+ for PRIMER: Guide to  
696 Software and Statistical Methods. PRIMER-E, Plymouth, UK.
- 697
